# Supplementary material for: Effectively Intervening Epithelial-Mesenchymal Transition of Retinal Pigment Epithelial Cells With a Combination of ROCK and TGF-β Signaling Inhibitors
Source: PubMed Central journal article supplement — Invest Ophthalmol Vis Sci. 2021 Apr 16;62(4):21. doi: 10.1167/iovs.62.4.21 (PMC8083104; doi:10.1167/iovs.62.4.21), 2021-04-16
Supplement: iovs-62-4-21_s002.pdf [file iovs-62-4-21_s002.pdf]

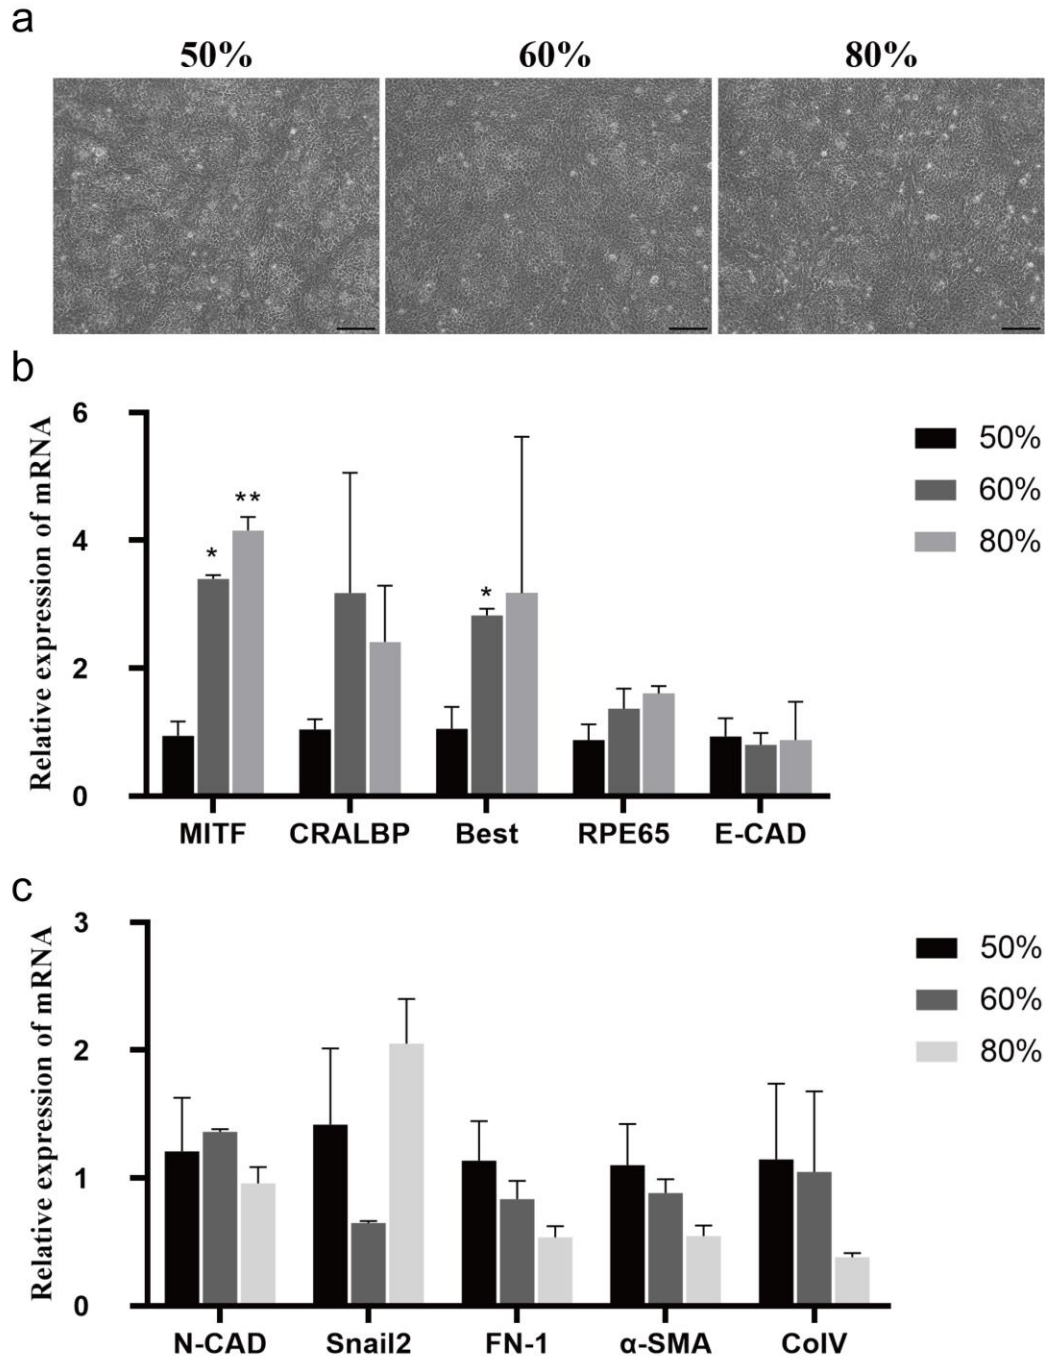

Figure S2. RPE maintenance in high cell density culture.

(a) Representative images showing the morphology of RPE cells cultured at 50%, 60% and 80% confluence for 14 days. Scale bar = 50  $\mu$ m.

(b-c) The mRNA expression levels of the RPE markers MITF, CRALBP, Best, RPE65, and E-Cadherin and the

EMT markers N-Cadherin, Snail2, FN1,  $\alpha$ -SMA and Col IV were tested by RT-PCR in RPE cells cultured at different confluences for 14 days. Data are presented as the means  $\pm$  SEM (n = 3 per group with duplicates).

\* $P < .05$ , \*\* $P < .01$ .
