# Supplementary material for: Effectively Intervening Epithelial-Mesenchymal Transition of Retinal Pigment Epithelial Cells With a Combination of ROCK and TGF-β Signaling Inhibitors
Source: PubMed Central journal article supplement — Invest Ophthalmol Vis Sci. 2021 Apr 16;62(4):21. doi: 10.1167/iovs.62.4.21 (PMC8083104; doi:10.1167/iovs.62.4.21), 2021-04-16
Supplement: iovs-62-4-21_s003.pdf [file iovs-62-4-21_s003.pdf]

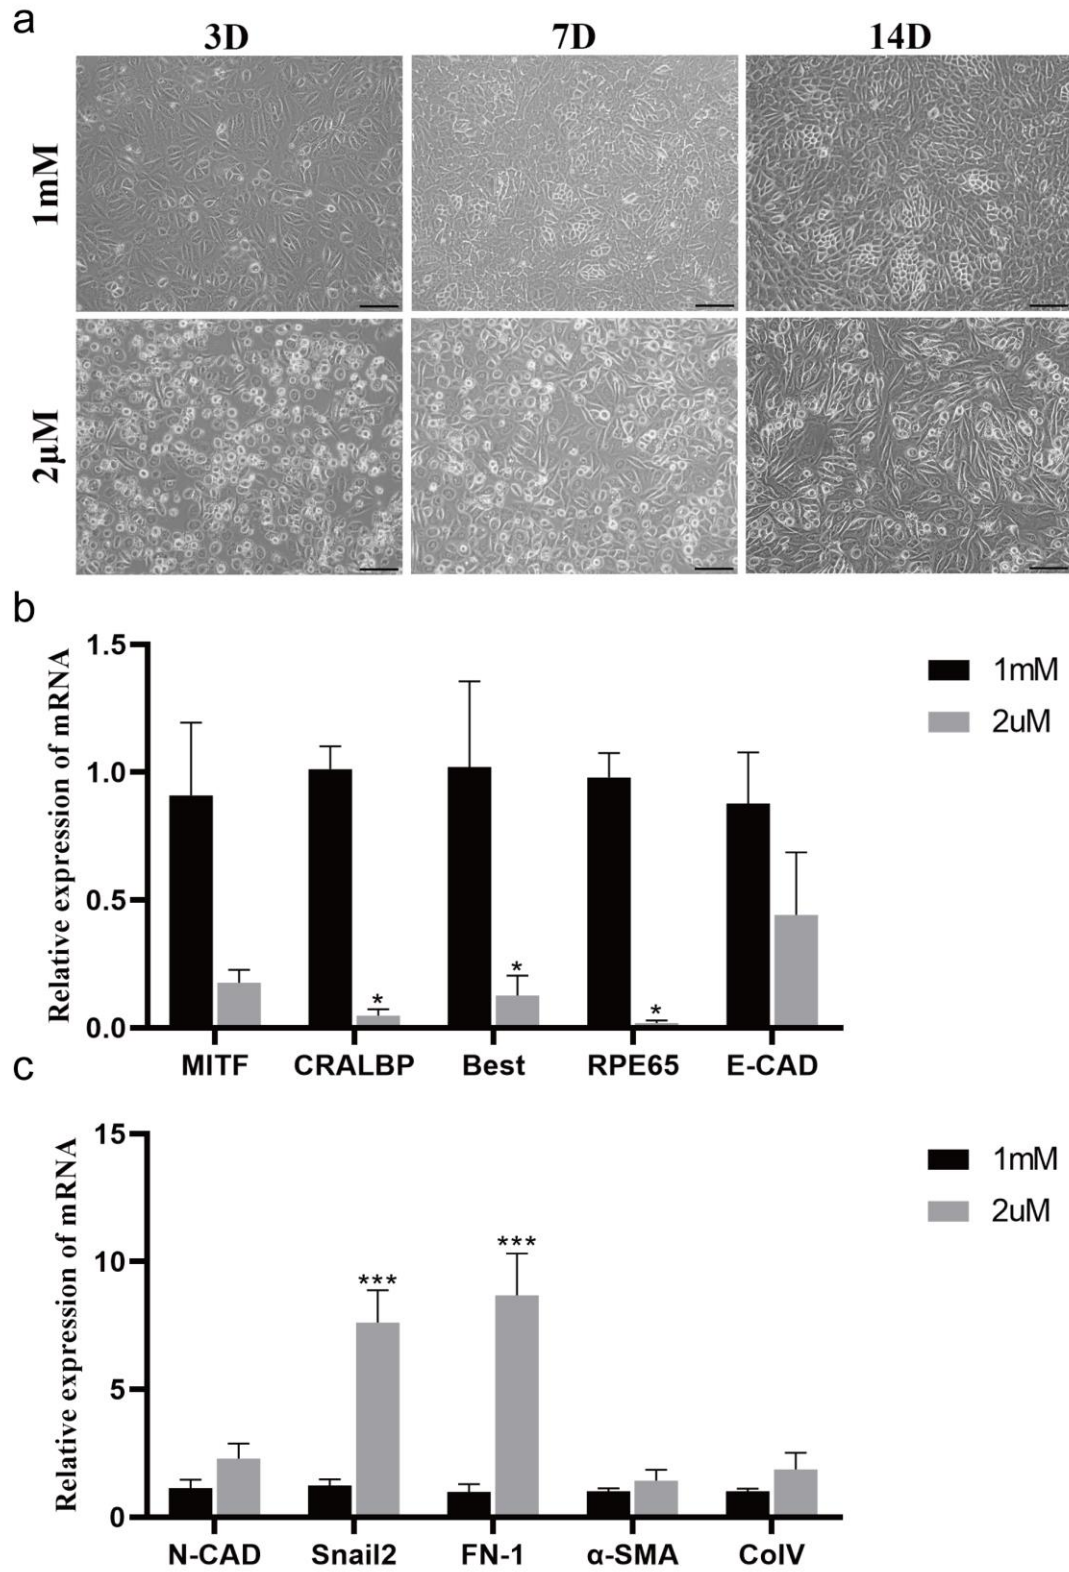

Figure S3. The effect of low  $\text{Ca}^{2+}$  on RPE cells.

(a) Representative images of RPE cells at 50% confluence plated in normal (1 mM) and low  $\text{Ca}^{2+}$  (2  $\mu\text{M}$ ) KSFM on days 3, 7 and 14 after plating. After seven days, the medium of the low- $\text{Ca}^{2+}$  group was changed to normal  $\text{Ca}^{2+}$  KSFM. Scale bar = 50  $\mu\text{m}$ .

(b–c) The mRNA expression levels of the RPE markers MITF, CRALBP, Best, RPE65, and E-Cadherin and the EMT markers N-Cadherin, Snail2, FN1,  $\alpha$ -SMA, and Col IV were tested by RT-PCR in RPE cells cultured for 14 days. Data are presented as the means  $\pm$  SEM (n = 3 per group with duplicates). \* $P < .05$ , \*\*\* $P < .001$ .
