# Supplementary material for: Effectively Intervening Epithelial-Mesenchymal Transition of Retinal Pigment Epithelial Cells With a Combination of ROCK and TGF-β Signaling Inhibitors
Source: PubMed Central journal article supplement — Invest Ophthalmol Vis Sci. 2021 Apr 16;62(4):21. doi: 10.1167/iovs.62.4.21 (PMC8083104; doi:10.1167/iovs.62.4.21), 2021-04-16
Supplement: iovs-62-4-21_s005.pdf [file iovs-62-4-21_s005.pdf]

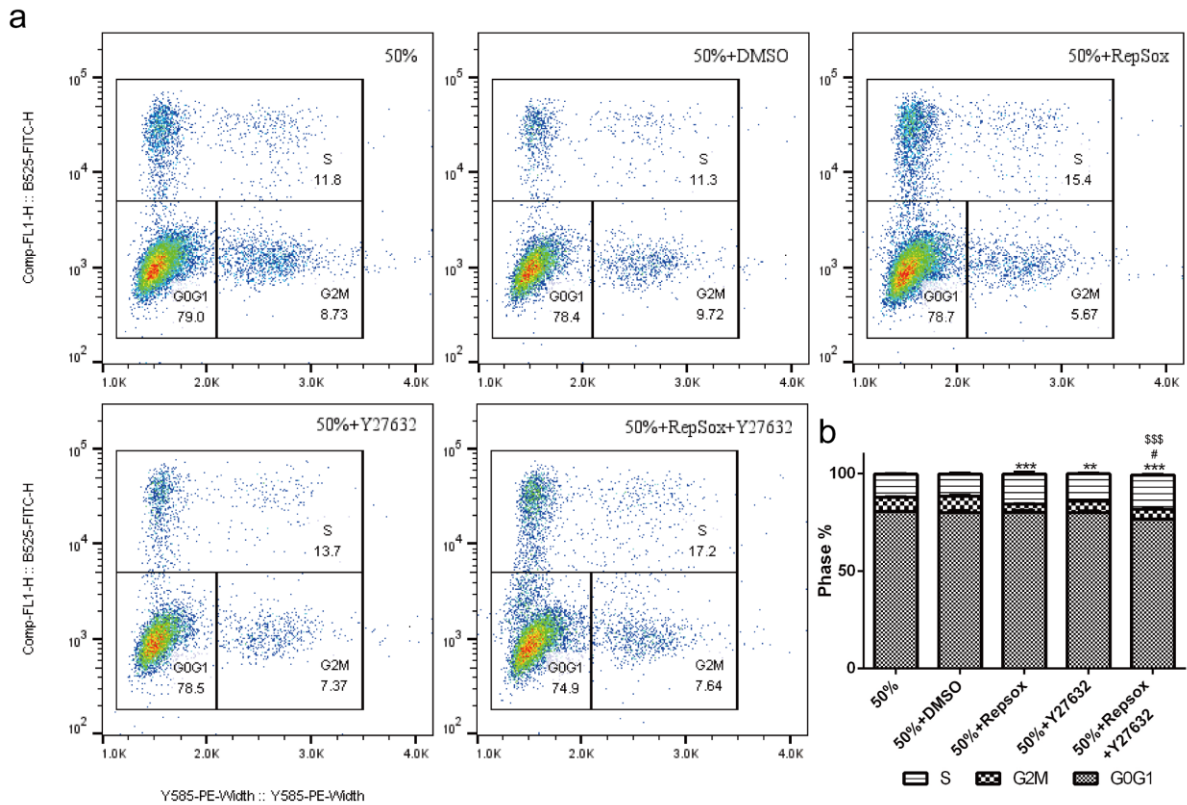

Figure S5. The effects of the combination of RepSox and Y27632 on the proliferation of RPE cells

(a) Representative density dot plots showing the EdU incorporation of RPE cells cultured at 50% confluence in 5 groups by FACS.

(b) The percentages of RPE cells in different phases of the cell cycle after 72 hours of culture ( $n = 3$  per group with duplicates).  $**P < .01$ ,  $***P < .001$  vs the 12.5%+DMSO group.  $\#P < .05$  vs the 12.5%+RepSox group.  $###P < .001$  vs the 12.5%+Y27632 group. The results are from three or more independent experiments.
