# Supplementary material for: Effectively Intervening Epithelial-Mesenchymal Transition of Retinal Pigment Epithelial Cells With a Combination of ROCK and TGF-β Signaling Inhibitors
Source: PubMed Central journal article supplement — Invest Ophthalmol Vis Sci. 2021 Apr 16;62(4):21. doi: 10.1167/iovs.62.4.21 (PMC8083104; doi:10.1167/iovs.62.4.21), 2021-04-16
Supplement: iovs-62-4-21_s006.pdf [file iovs-62-4-21_s006.pdf]

**Table Supplement 1.** Primary antibodies used for immunofluorescence (IF) and western blot (WB)

| <b>Antibody name</b>                                | <b>Manufacturer</b>       | <b>Catalog #</b>      | <b>Application</b> | <b>Dilution</b> |
|-----------------------------------------------------|---------------------------|-----------------------|--------------------|-----------------|
| HRP-conjugated beta Actin Mouse Monoclonal antibody | Proteintech               | HRP-60008             | WB                 | 1:10000         |
| HRP-conjugated GAPDH Mouse Monoclonal antibody      | Proteintech               | HRP-60004             | WB                 | 1:10000         |
| HRP-conjugated Affinipure Goat Anti-Mouse IgG(H+L)  | Proteintech               | SA00001-1             | WB                 | 1:5000          |
| HRP-conjugated Affinipure Goat Anti-Rabbit IgG(H+L) | Proteintech               | SA00001-2             | WB                 | 1:5000          |
| Anti-mouse IgG-Alexa fluor 488                      | Invitrogen                | A11001                | IF                 | 1:500           |
| Anti-mouse IgG-Alexa fluor 555                      | Invitrogen                | A21422                | IF                 | 1:500           |
| Anti-rabbit IgG-Alexa fluor 488                     | Invitrogen                | A11008                | IF                 | 1:500           |
| Anti-rabbit IgG-Alexa fluor 555                     | Invitrogen                | A21428                | IF                 | 1:500           |
| ZO-1                                                | Invitrogen<br>Proteintech | 61-7300<br>21773-1-AP | IF<br>WB           | 1:200<br>1:1000 |
| $\alpha$ -SMA                                       | Abcam<br>Proteintech      | Ab7817<br>14395-1-AP  | IF<br>WB           | 1:200<br>1:1000 |
| PAI-1                                               | Proteintech               | 13801-1-AP            | IF<br>WB           | 1:200<br>1:1000 |
| Phalloidin-iFluor 488 for F-Actin                   | Abcam                     | Ab176753              | IF                 | -               |
| Zeb1                                                | CST                       | 70512                 | WB                 | 1:1000          |
| FN1                                                 | Proteintech               | 66042-1-Ig            | WB                 | 1:2000          |
| E-Cadherin                                          | CST                       | 14472                 | WB                 | 1:1000          |
| N-Cadherin                                          | Proteintech               | 22018-1-AP            | WB                 | 1:2000          |
| DCT                                                 | Proteintech               | 13095-1-AP            | WB                 | 1:1000          |
| CRALBP                                              | Proteintech               | 15356-1-AP            | WB                 | 1:200           |
| OTX2                                                | Proteintech               | 13497-1-AP            | WB                 | 1:1000          |
| MITF                                                | Proteintech               | 13092-1-ap            | WB                 | 1:1000          |
| RPE65                                               | Proteintech               | 17939-1-AP            | WB                 | 1:1000          |
