# Supplementary material for: Effectively Intervening Epithelial-Mesenchymal Transition of Retinal Pigment Epithelial Cells With a Combination of ROCK and TGF-β Signaling Inhibitors
Source: PubMed Central journal article supplement — Invest Ophthalmol Vis Sci. 2021 Apr 16;62(4):21. doi: 10.1167/iovs.62.4.21 (PMC8083104; doi:10.1167/iovs.62.4.21), 2021-04-16
Supplement: iovs-62-4-21_s007.pdf [file iovs-62-4-21_s007.pdf]

**Table Supplement 2** Primers used for RT-qPCR to detect gene expression.

| <b>Primer name</b> | <b>Primer sequence (forward)</b> | <b>Primer sequence (reverse)</b> | <b>species</b> |
|--------------------|----------------------------------|----------------------------------|----------------|
| GAPDH              | ACATCGCTCAGACACCATG              | TGTAGTTGAGGTCAATGAAGGG           | human          |
| MITF               | AGGAAATCTTGGGCTTGATGG            | TGTTGGGAAGGTTGGCTG               | human          |
| OTX2               | CTTCGGGTATGGACTTGCTG             | GTCTTGGCAAACAGTGCTTC             | Human          |
| RPE-65             | TTTCTCACCCAGATGCCTTG             | TTTCTCACCCAGATGCCTTG             | Human          |
| CRALBP             | CCTGCAAGTGGAAGAGAAGAA            | TTCCCTAGGATAGGAAGTCAGG           | Human          |
| Tyr                | TCATCCAAAGATCTGGGCTATG           | CCAAGGAGCCATGACCAG               | Human          |
| TYRP1              | ATACTGGGACCAGATGGCAACACA         | AAGCGGGTCCTTCGTGAGAGAAAT         | Human          |
| PMEL               | ACCTATCCCTGAGCCTGAAG             | CGATACAGAACACAATCCAGGG           | Human          |
| Best               | TCATCCCCATTTCTTCGTG              | TTGCTCGTCCTTGCCTTC               | human          |
| E-Cadherin         | TGGGTATTCCCTCCCATCAG             | TTTGTGAGGGAGCTCAGGAT             | human          |
| PAI-1              | GCCCTTGAGTGCTTGTTAGA             | TGGCTGGACTTCCTGAGATA             | human          |
| FN1                | GAGCTGCACATGTCTTGGGAAC           | GGAGCAAATGGCACCGAGATA            | human          |
| $\alpha$ -SMA      | GGGACATCAAGGAGAAACTG             | CAGGCAACTCGTAACTCTTC             | human          |
| N-Cadherin         | ACAGTGGCCACCTACAAAGG             | CCGAGATGGGGTTGATAATG             | human          |
| Col IV             | CATGGACTGGTTTCCACAA              | TGAAGGGCTACATCAGAAATG            | human          |
| Zeb1               | GTGGCGGTAGATGGTAATG              | ACCTTGTTGTATGGGTGAAG             | human          |
