# Supplementary figures and images for: Effectively Intervening Epithelial-Mesenchymal Transition of Retinal Pigment Epithelial Cells With a Combination of ROCK and TGF-β Signaling Inhibitors
Source: PubMed Central journal article supplement — Invest Ophthalmol Vis Sci. 2021 Apr 16;62(4):21. doi: 10.1167/iovs.62.4.21 (PMC8083104; doi:10.1167/iovs.62.4.21), 2021-04-16

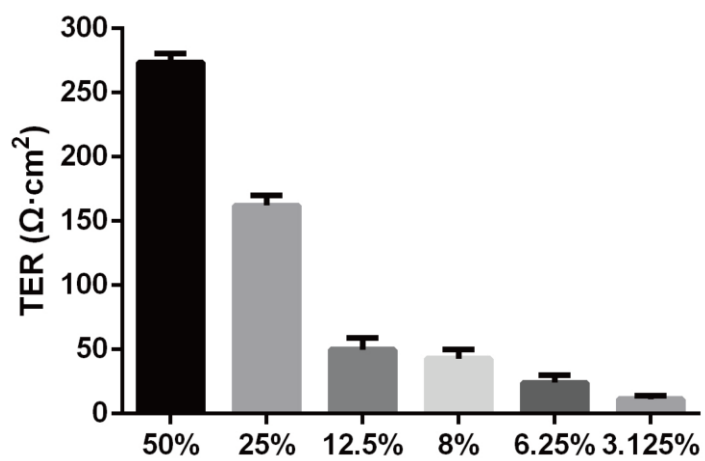

Figure S1. The TER levels of RPE monolayers cultured at different densities for 14 days.

Supplement: iovs-62-4-21_s001.pdf [file iovs-62-4-21_s001.pdf]
